# Supplementary material for: Indium-doped flower-shaped PdIn nanocatalysts for enhanced ethanol oxidation
Source: Royal Society of Chemistry journal article supplement (doi:10.1039/d3cy00684k), 2023-01-01
Supplement: d3cy00684k1.pdf [file d3cy00684k1.pdf]

Electronic Supplementary Information for

## **Indium-doped flower-shaped PdIn nanocatalyst for enhanced ethanol oxidation**

*Jingjing Dou,<sup>a</sup> Xiang Li,<sup>a\*</sup> Bo Xi,<sup>a</sup> Xiaoxuan Yang,<sup>a</sup> Yaming Liu,<sup>b</sup> Changqing Jin,<sup>a</sup> Junjun Zhang<sup>c</sup>*

<sup>a</sup>Shaanxi Key Laboratory of Optoelectronic Functional Materials and Devices, School of Materials and Chemical Engineering, Xi'an Technological University, Xi'an, Shaanxi, 710021, China.

<sup>b</sup>School of Textile Science and Engineering, Xi'an Polytechnic University, Xi'an, Shanxi, 710048, China.

<sup>c</sup>State Key Laboratory of High-Efficiency Utilization of Coal and Green Chemical Engineering, College of Chemistry and Chemical Engineering, Ningxia University, Yinchuan, Ningxia, 750021, China.

\*To whom correspondence should be addressed. E-mail: [lixiang@xatu.edu.cn](mailto:lixiang@xatu.edu.cn)

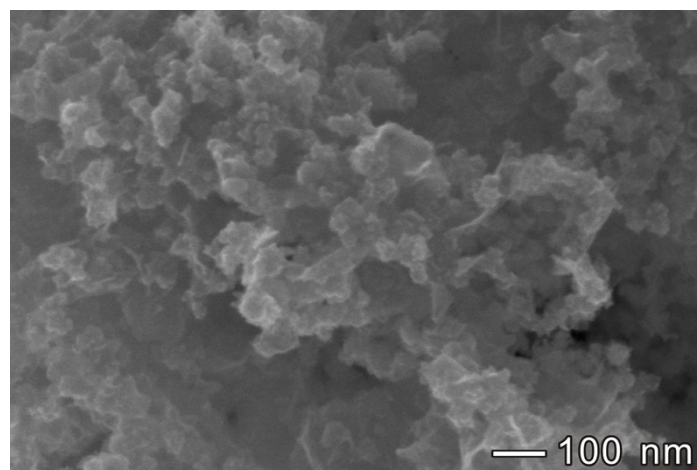

**Figure S1.** The SEM characterizations of PdIn<sub>0.024</sub> nanocatalysts.

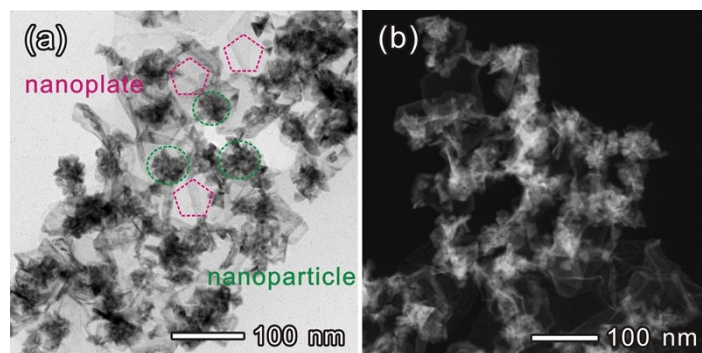

**Figure S2.** The TEM characterizations of Pd nanocatalysts without indium atoms at 80 ° C.  
(a) TEM images. (b) HAADF-STEM images.

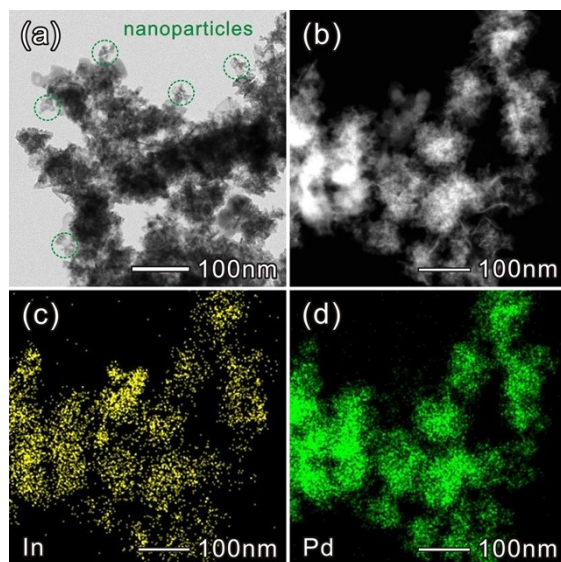

**Figure S3.** The TEM characterizations of indium-doped flower-shaped PdIn nanocatalysts when the reaction temperature is 60 ° C. (a) TEM images. (b) HAADF-STEM images. (c, d) EDX elemental mappings.

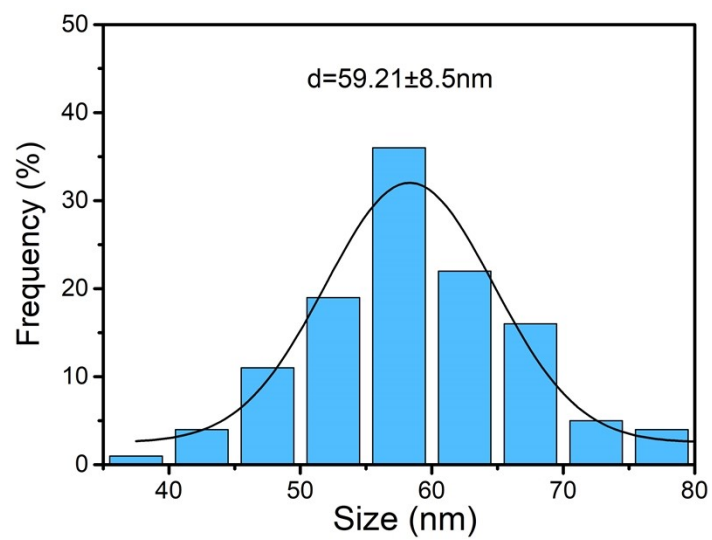

**Figure S4.** The size distribution of indium-doped flower-shaped PdIn nanocatalysts when reaction temperature is 60 ° C.

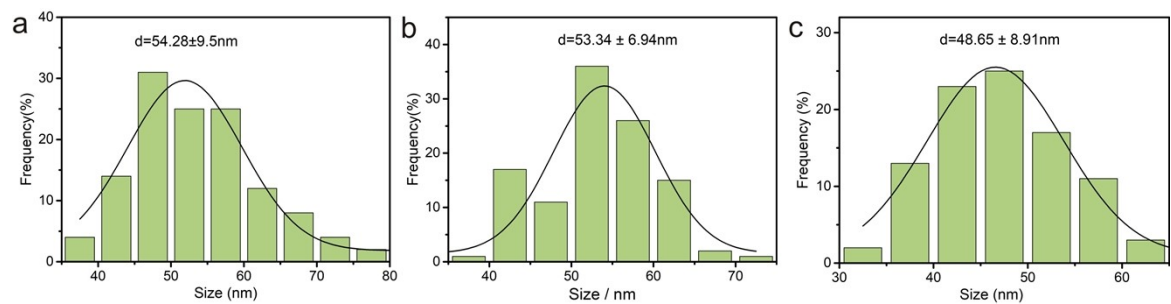

**Figure S5.** The size distribution of indium-doped flower-shaped PdIn nanocatalysts with different contents of indium atoms. (a) PdIn<sub>0.017</sub>. (b) PdIn<sub>0.024</sub>. (c) PdIn<sub>0.052</sub>.

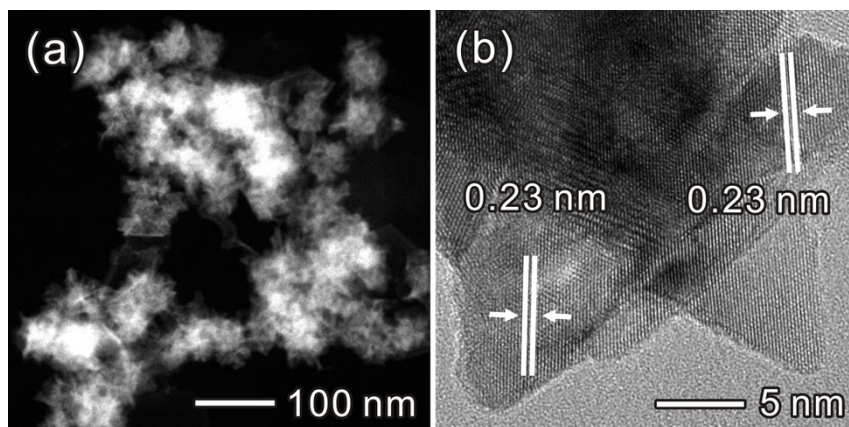

**Figure S6.** The TEM characterizations of indium-doped flower-shaped PdIn<sub>0.017</sub> nanocatalyst. (a) HAADF-STEM image. (b) HRTEM image.

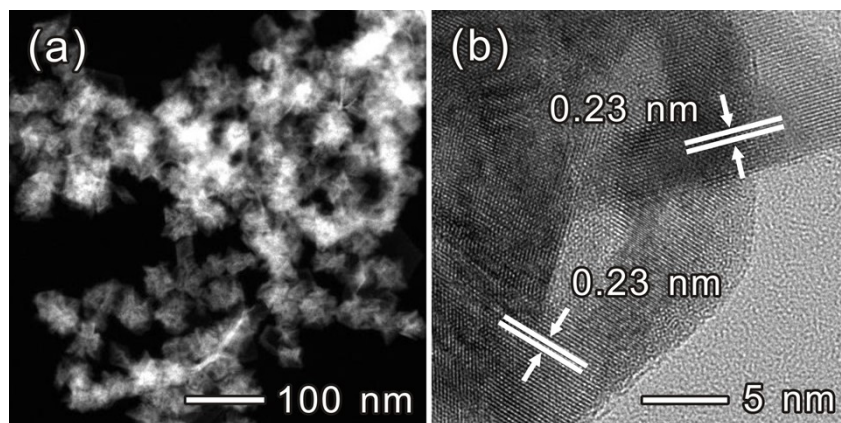

**Figure S7.** The TEM characterizations of indium-doped flower-shaped PdIn<sub>0.052</sub> nanocatalyst.  
(a) HAADF-STEM image. (b) HRTEM image.



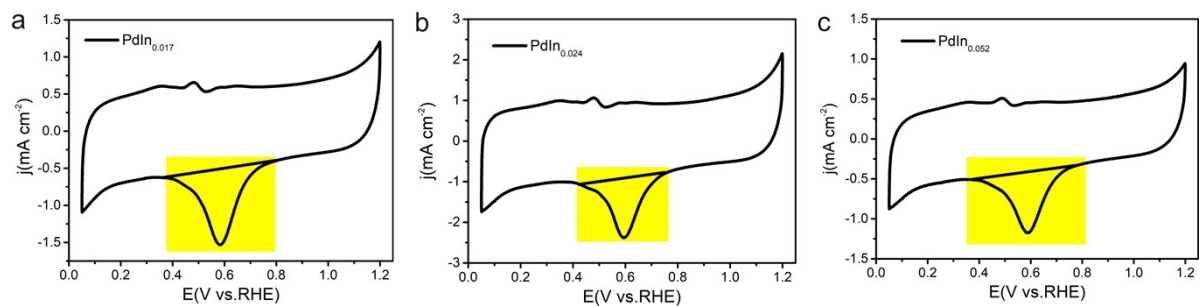

**Figure S8.** Cyclic voltammetry curves of indium-doped flower-shaped PdIn nanocatalysts with different contents of indium atoms in  $N_2$ -saturated KOH (1 M) solution at a scanning rate of  $50 \text{ mV s}^{-1}$ .

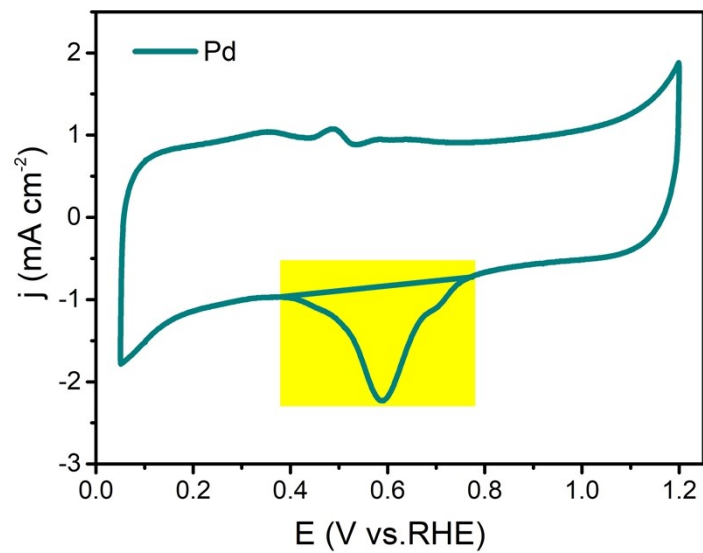

**Figure S9.** Cyclic voltammetry curve of Pd nanocatalyst without indium atoms in N<sub>2</sub>-saturated KOH (1 M) solution at a scanning rate of 50 mV s<sup>-1</sup>.

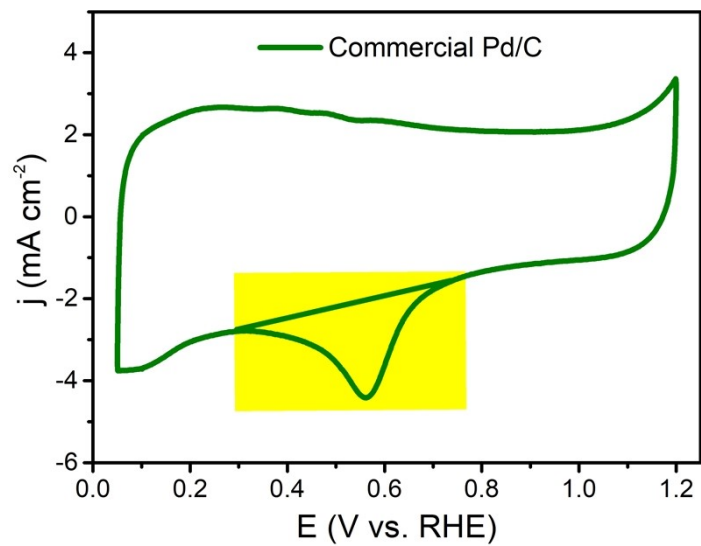

**Figure S10.** Cyclic voltammetry curve of commercial Pd/C nanocatalyst in N<sub>2</sub>-saturated KOH (1 M) solution at a scanning rate of 50 mV s<sup>-1</sup>.

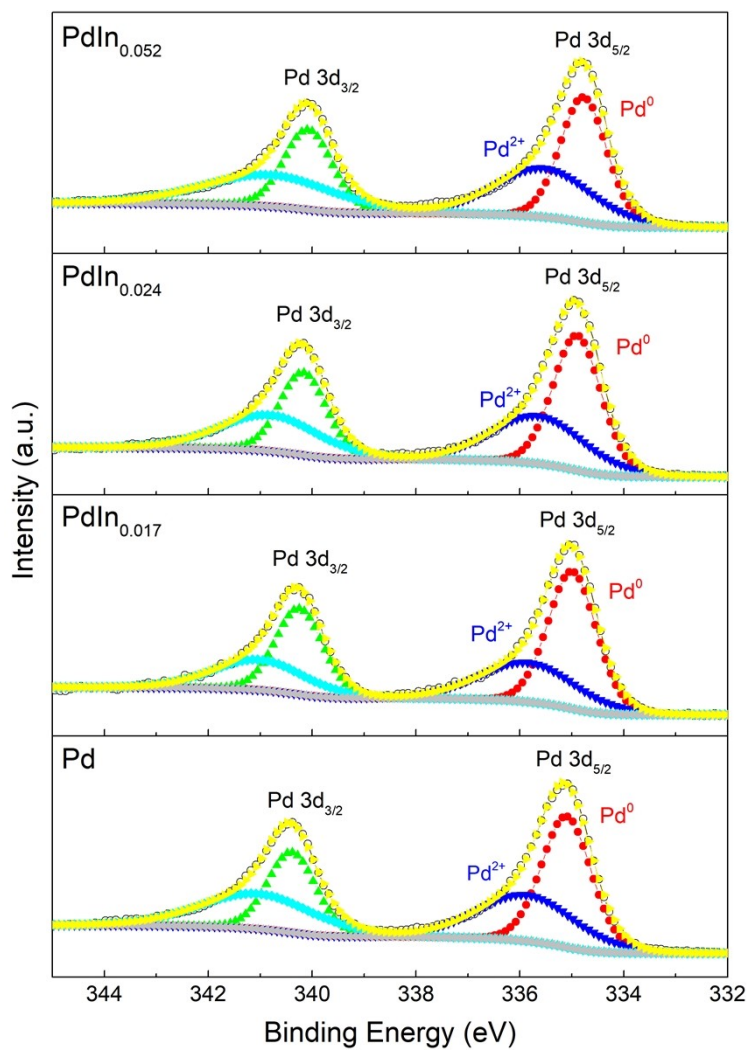

**Figure S11.** The XPS characterizations of Pd 3d core levels for PdIn nanocatalyst with different contents of In atoms.

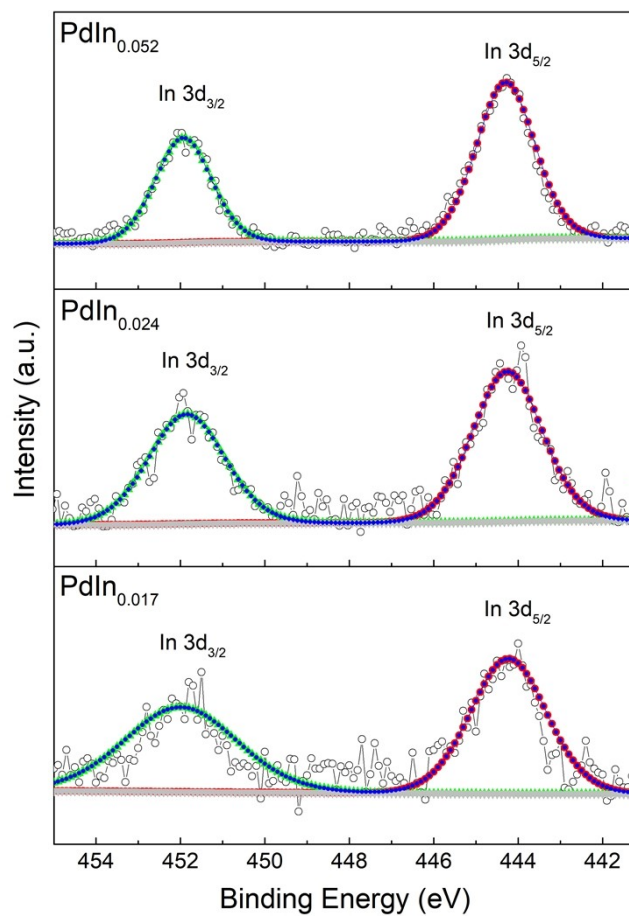

**Figure S12.** The XPS characterizations of In 3d core levels for PdIn nanocatalyst with different contents of In atoms.

**Table S1.** The metal loadings of indium-doped flower-shaped PdIn nanocatalysts with different contents of indium atoms on electrode determined by ICP-MS.

| Sam<br>ple | Tem<br>p. (°<br>C) | Mass<br>(Pd)<br>/ μg | Mass<br>(In)<br>/ μg | Mass<br>(Mo)<br>/ μg | M<br>(Pd)<br>/ M<br>(In) |
|------------|--------------------|----------------------|----------------------|----------------------|--------------------------|
| PdIn<br>-1 | 80                 | 5.12                 | 0.09                 | 0                    | 1:0.0<br>17              |
| PdIn<br>-2 | 100                | 5.09                 | 0.12                 | 0                    | 1:0.0<br>24              |
| PdIn<br>-3 | 120                | 5.09                 | 0.26                 | 0                    | 1:0.0<br>52              |

**Table S2.** The EOR performances of the indium-doped flower-shaped PdIn nanocatalysts with different contents of indium atoms and commercial Pd/C nanocatalyst.

| Sample                | ECSA (m <sup>2</sup> /g) | Mass Activities (mA/mg) | Specific Activities (mA/cm <sup>2</sup> ) |
|-----------------------|--------------------------|-------------------------|-------------------------------------------|
| Pd/C                  | 23.7                     | 598                     | 2.52                                      |
| Pd                    | 19.6                     | 1411                    | 7.19                                      |
| PdIn <sub>0.017</sub> | 22.2                     | 2246                    | 10.09                                     |
| PdIn <sub>0.024</sub> | 22.6                     | 2380                    | 10.51                                     |
| PdIn <sub>0.052</sub> | 22.4                     | 2178                    | 9.73                                      |

**Table S3.** Summary of the EOR performances of recently reported Pd-based electrocatalysts in alkaline electrolytes.

| Catalysts                         | Electrolyte                   | $J_{\text{mass}}$<br>(A mg <sup>-1</sup> ) | $J_{\text{specific}}$<br>(mA cm <sup>-2</sup> ) | References                                          |
|-----------------------------------|-------------------------------|--------------------------------------------|-------------------------------------------------|-----------------------------------------------------|
| PdIn <sub>0.024</sub>             | 1.0 M KOH +<br>1.0 M ethanol  | 2.38                                       | 10.5                                            | This work                                           |
| Pd/CuO-<br>Ni(OH) <sub>2</sub> /C | 1.0 M KOH +<br>1.0 M ethanol  | 3.74                                       | 6.88                                            | <i>Green Chem.</i> ,<br>2022, 24(6):<br>2438-2450.  |
| PdZn nanosheets                   | 1.0 M NaOH +<br>1.0 M ethanol | 2.73                                       | -                                               | <i>ACS nano</i> , 2019,<br>13(12): 14329-<br>14336. |
| PdCu nanosheets                   | 1.0 M KOH +<br>1.0 M ethanol  | 2.54                                       | 4.02                                            | <i>Langmuir</i> , 2022,<br>38(14): 4287-<br>4294.   |
| PdPb nanochains                   | 1.0 M KOH +<br>1.0 M ethanol  | 2.52                                       | 6.27                                            | <i>Rare Metals</i> , 39,<br>792–799 (2020).         |
| PdSn nanoparticle                 | 1.0 M KOH +<br>1.0 M ethanol  | 2.46                                       | 4.12                                            | <i>ChemCatChem</i> ,<br>2023, 15(5):<br>e202201357. |
| PdNi nanowires                    | 1.0 M KOH +<br>1.0 M ethanol  | 2.12                                       | -                                               | <i>Sci. China Chem.</i> ,<br>2021, 64, 245-<br>252. |



| Catalysts                                                        | Electrolyte                                             | $J_{\text{mass}}$<br>(A.mg <sup>-1</sup> ) | $J_{\text{specific}}$<br>(mA.cm <sup>-2</sup> ) | References                                                           |
|------------------------------------------------------------------|---------------------------------------------------------|--------------------------------------------|-------------------------------------------------|----------------------------------------------------------------------|
| PdB nanowires                                                    | 1.0 M KOH +<br>1.0 M ethanol                            | 2.05                                       | 5.94                                            | <i>ACS Appl. Mater. &amp; Interface</i> , 2021, 13(15): 17599-17607. |
| Pt <sub>36</sub> Pd <sub>41</sub> Cu <sub>23</sub> nanocomposite | 0.5 M H <sub>2</sub> SO <sub>4</sub> +<br>1.0 M ethanol | 1.88                                       | 4.38                                            | <i>Nanotechnology</i> , 2022, 33 (33), 335401.                       |
| PdAg nanaosheets                                                 | 1.0 M KOH +<br>1.0 M ethanol                            | 1.87                                       | -                                               | <i>Langmuir</i> , 2020, 36(37): 11094-11101.                         |
| Pd/Ni(OH) <sub>2</sub>                                           | 1.0 M KOH +<br>1.0 M ethanol                            | 1.55                                       | 3.83                                            | <i>Adv. Mater.</i> , 2017, 29, 1703057.                              |
| CuPdNiP nanohollow structures                                    | 1.0 M KOH +<br>1.0 M ethanol                            | 1.19                                       | 1.39                                            | <i>ACS Appl. Energy Mater.</i> , 2019, 2, 5525-5533.                 |
| PdRuCu nanoassemblies                                            | 0.5 M KOH +<br>0.5 M ethanol                            | 1.16                                       | 3.78                                            | <i>Appl. Surf. Sci.</i> , 2020, 506, 144791.                         |
